# Supplementary material
Source: MDPI journal article supplement (https://www.mdpi.com/2077-0472/12/12/2065)
Supplement: s1 [file s1]

**Table S2.** Monte Carlo permutation test of soil phoD microbial communities and soil properties.

| Factors        | pH    | SOM    | TN     | AN     | TP     | AP     | humus  |
|----------------|-------|--------|--------|--------|--------|--------|--------|
| RDA1           | 0.982 | -0.997 | -0.995 | -0.942 | -0.943 | -0.964 | -0.834 |
| RDA2           | 0.190 | 0.075  | -0.096 | -0.335 | -0.332 | -0.267 | -0.552 |
| r <sup>2</sup> | 0.123 | 0.523  | 0.544  | 0.487  | 0.702  | 0.827  | 0.458  |
| Pr(>r)         | 0.431 | 0.007  | 0.012  | 0.009  | 0.001  | 0.001  | 0.019  |
| Significance   |       | **     | *      | **     | ***    | ***    | *      |

Note: \* 0.05, \*\* 0.01, \*\*\*0.001, p values based on 999 permutations.
