# Supplementary material
Source: MDPI journal article supplement (https://www.mdpi.com/2077-0472/12/12/2065)
Supplement: s1 [file s1]

**Table S1.** Basic properties of original lake sediment and compressed sediment used in the experiment.

| Items      | Original lake sediment | Compressed sediment |
|------------|------------------------|---------------------|
| pH         | 7.45                   | 7.30                |
| SOM (g/kg) | 6.63                   | 61.52               |
| TN (g/kg)  | 0.16                   | 1.52                |
| TP (g/kg)  | 0.64                   | 6.11                |
| TK (g/kg)  | 1.26                   | 12.00               |
| Cd (mg/kg) | 3.06                   | 9.48                |
| Cr (mg/kg) | 52.34                  | 169.56              |
| Pb (mg/kg) | 23.98                  | 98.31               |
| As (mg/kg) | 0.61                   | 1.52                |
| Hg (mg/kg) | 0.33                   | 1.24                |
| Ni (mg/kg) | 28.30                  | 83.93               |

Note: SOM: soil organic matter; TN, total nitrogen; T: total phosphorus; TK: total potassium.
